# Supplementary material
Source: publisher figshare collection journal article supplement (https://tandf.figshare.com/ndownloader/files/18605843)
Supplement: Supplementary file 1 [file 18605843]

**The Anisian (Middle Triassic) brachiopod fauna from Qingyan, Guizhou, southwestern China**

Zhen Guoa, Zhong-Qiang Chena* and David A. T. Harpera,b

*aState Key Laboratory of Biogeology and Environmental Geology, China University of Geosciences (Wuhan), Wuhan 430074, China; bPalaeoecosystems Group, Department of Earth Sciences, Durham University, Durham DH1 3LE, UK*

*corresponding author: [zhong.qiang.chen@cug.edu.cn](mailto:zhong.qiang.chen@cug.edu.cn)

**Supplementary Tables S1-S22: Measurements of registered specimens**

Some incomplete or strongly deformed specimens are not listed here. All dimensions are in millimeters. Abbreviations: as, articulated shells; vv, ventral valve; dv, dorsal valve.

Table S1. Dimensions of *Caucasorhynchella subfissicostata* (Yang & Xu, 1966).

| Registration no. | Length | Width | Thickness | Preservation |
| --- | --- | --- | --- | --- |
| BGEG WCP10032 | 13.85 | 17.31 | 9.64 | as |
| BGEG WCP10033 | 13.22 | 16.21 | 9.14 | as |
| BGEG WCP10034 | 12.48 | 14 | 7.43 | as |
| BGEG WCP10035 | 13.7 | 17.11 | 10.45 | as |
| BGEG WCP10036 | 11.73 | 14.96 | 9.13 | as |
| BGEG WCP10037 | 13.49 | 17.11 | 9.74 | as |
| BGEG WCP10038 | 12.99 | 15.52 | 8.9 | as |
| BGEG WCP10039 | 13.8 | 14.72 | 9.72 | as |
| BGEG WCP10040 | 13.96 | 18.48 | 9.58 | as |
| BGEG WCP10041 | 13.16 | 16.11 | 7.63 | as |
| BGEG WCP10042 | 13.18 | 14.5 | 9.77 | as |
| BGEG WCP10043 | 14.81 | 16.16 | 11.1 | as |
| BGEG WCP10044 | 14.65 | 18.16 | 10.49 | as |
| BGEG WCP10045 | 14.07 | 17.69 | 11.07 | as |
| BGEG WCP10046 | 14.55 | 17.36 | 10.72 | as |
| BGEG WCP10047 | 13.13 | 15.24 | 10.77 | as |
| BGEG WCP10048 | 12.59 | 16.46 | 10.21 | as |
| BGEG WCP10049 | 11.75 | 12.74 | 7.04 | as |
| BGEG WCP10050 | 13.84 | 16.54 | 11.22 | as |

Table S2. Dimensions of *Septaliphorioidea paucicostata* Yang & Xu, 1966.

| Registration no. | Length | Width | Thickness | Preservation |
| --- | --- | --- | --- | --- |
| BGEG WCP10051 | 6.51 | 6.93 | 5 | as |
| BGEG WCP10052 | 7.28 | 8.06 | 5.14 | as |
| BGEG LDP10010 | 6.94 | 8.45 | 4.66 | as |
| BGEG LDP10011 | 7.8 | 9.38 | 4.79 | as |
| BGEG LDP10012 | 6.17 | 6.4 | 2.91 | as |
| BGEG LDP10013 | 6.83 | 7.43 | 5.05 | as |
| BGEG LDP10014 | 6.9 | 7.24 | 4.16 | as |
| BGEG LDP10015 | 6.54 | 6.87 | 4.25 | as |
| BGEG LDP10016 | 6.52 | 6.71 | 3.54 | as |
| BGEG LDP10017 | 6.63 | 7.56 | 3.22 | as |
| BGEG LDP10018 | 6.02 | 6.33 | 3.96 | as |
| BGEG LDP10019 | 6.07 | 7.25 | 4.55 | as |

Table S3. Dimensions of *Rutorhynchia*? *trigonalis* sp. nov.

| Registration no. | Length | Width | Thickness | Preservation |
| --- | --- | --- | --- | --- |
| BGEG LDP10020 | 6.05 | 5.43 | 4.18 | as |
| BGEG LDP10021 | - | 5.29 | - | as (deformed) |
| BGEG LDP10022 | 6.73 | 5.43 | - | as (deformed) |

Table S4. Dimensions of *Nudirostralina subtrinodosi* Yang & Xu, 1966.

| Registration no. | Length | Width | Thickness | Preservation |
| --- | --- | --- | --- | --- |
| BGEG LDP10031 | 9.06 | 9.8 | 7.7 | as |
| BGEG LDP10032 | 9.45 | 10.47 | 8.08 | as |
| BGEG LDP10033 | 9.71 | 13.67 | 12.6 | as |
| BGEG LDP10034 | 9.5 | 13.11 | - | as |
| BGEG LDP10035 | 9.95 | 9.58 | 6.1 | as (deformed) |
| BGEG LDP10036 | 9.63 | 10.36 | 7.16 | as |
| BGEG LDP10037 | 11.3 | 13.32 | 10.54 | as |
| BGEG LDP10038 | 10 | 10.33 | 7.03 | as |
| BGEG LDP10039 | 9.11 | 10.4 | 7.85 | as |
| BGEG LDP10040 | 6.96 | 9.71 | 6.45 | as |
| BGEG LDP10041 | 11.03 | 13.7 | - | as (deformed) |
| BGEG LDP10042 | 11.57 | 13.53 | - | as (deformed) |
| BGEG LDP10043 | 11.41 | 11.9 | 8.74 | as |
| BGEG LDP10044 | 11.97 | 12.04 | 8.57 | as (deformed) |
| BGEG LDP10045 | 10.98 | 14.26 | 11.06 | as |

Table S5. Dimensions of *Nudirostralina minuta* sp. nov.

| Registration no. | Length | Width | Thickness | Preservation |
| --- | --- | --- | --- | --- |
| BGEG LDP10047 | 6.8 | 6.66 | 5.38 | as |
| BGEG LDP10048 | 7.42 | 6.72 | 5.33 | as (deformed) |
| BGEG LDP10049 | 6.15 | 6 | 3.74 | as |
| BGEG LDP10050 | 6.77 | 6.84 | - | as (deformed) |

Table S6. Dimensions of *Parabrekia yangi* sp. nov.

| Registration no. | Length | Width | Thickness | Preservation |
| --- | --- | --- | --- | --- |
| BGEG LDP10051 | 8.94 | 9.15 | 3.19 | as |
| BGEG LDP10052 | 9.49 | 10.54 | 3.1 | as |
| BGEG LDP10053 | 9.98 | 12.08 | - | as (deformed) |
| BGEG LDP10054 | 7.46 | 7.33 | 3.12 | as |
| BGEG LDP10055 | 5.93 | 5.32 | 2.49 | as |
| BGEG LDP10056 | 6.78 | 5.96 | 3.3 | as |
| BGEG LDP10057 | 8.92 | 8.53 | 3.88 | as |
| BGEG LDP10058 | 6.88 | 7.38 | - | as (deformed) |
| BGEG LDP10059 | 9.76 | 10.04 | 2.57 | as |
| BGEG LDP10134 | 7.56 | 7.42 | 3.11 | as |
| BGEG LDP10135 | 10.25 | 10.01 | - | as (deformed) |
| BGEG LDP10136 | 6.73 | 6.84 | - | as (deformed) |

Table S7. Dimensions of *Diholkorhynchia sinensis* (Koken, 1900).

| Registration no. | Length | Width | Thickness | Preservation |
| --- | --- | --- | --- | --- |
| BGEG WCP10053 | 7.86 | 7.34 | 5.23 | as |
| BGEG WCP10054 | 12.2 | 11.68 | 7.65 | as |
| BGEG WCP10055 | 10.84 | 8.57 | 7.65 | as |
| BGEG WCP10056 | 10.76 | 10.38 | 6.43 | as |
| BGEG WCP10057 | 12 | 12.1 | 8.03 | as |
| BGEG WCP10058 | 10.23 | 9.51 | 6.97 | as |
| BGEG WCP10059 | 8.46 | 8.76 | 6.66 | as |
| BGEG WCP10060 | 7.54 | 6.91 | 4.74 | as |
| BGEG WCP10061 | 9.8 | 9.13 | 6.21 | as |
| BGEG WCP10062 | 11.06 | 9.91 | 6.35 | as |
| BGEG WCP10063 | 11.6 | 10.83 | 6.88 | as |
| BGEG WCP10064 | 11.4 | 10.59 | 7.32 | as |
| BGEG WCP10065 | 11.18 | 10 | 7.02 | as |
| BGEG WCP10066 | 9.19 | 8.68 | 6.69 | as |
| BGEG WCP10067 | 10.97 | 9.5 | 6.77 | as |
| BGEG WCP10068 | 10.83 | 9.33 | 6.57 | as |
| BGEG WCP10069 | 10.2 | 9.07 | 6.89 | as |
| BGEG WCP10070 | 11.25 | 10.98 | 7.45 | as |
| BGEG WCP10071 | 10.52 | 10.01 | 6.55 | as |
| BGEG WCP10072 | 9.83 | 9.18 | 5.94 | as |
| BGEG LDP10023 | 11.77 | 11.12 | 7.88 | as |
| BGEG LDP10024 | 12.98 | 12.24 | 8.12 | as |
| BGEG LDP10025 | 11.55 | 10.36 | 6.86 | as |
| BGEG LDP10026 | 10.42 | 9.87 | 6.95 | as |
| BGEG LDP10027 | 10.27 | 9.99 | 7.06 | as |
| BGEG LDP10028 | 9.6 | 8.69 | 6.67 | as |
| BGEG LDP10029 | 9.87 | 8.19 | 6.04 | as |
| BGEG LDP10030 | 9.54 | 8.56 | 6.07 | as |

Table S8. Dimensions of *Costirhynchopsis sinensis* (Yang & Xu, 1966).

| Registration no. | Length | Width | Thickness | Preservation |
| --- | --- | --- | --- | --- |
| BGEG WCP10073 | 10.34 | 12.21 | 8.63 | as |
| BGEG LDP10060 | 11.53 | 11.96 | 9.12 | as |
| BGEG LDP10061 | 11.43 | 11 | 9.07 | as |

Table S9. Dimensions of *Cassianospira wachangpoensis* (Stiller, 1999).

| Registration no. | Length | Width | Thickness | Hinge width | Interarea height | Preservation |
| --- | --- | --- | --- | --- | --- | --- |
| BGEG WCP10001 | 6.64 | 5.11 | 4.16 | 3.04 | 2.56 | as |
| BGEG WCP10002 | 6.49 | 4.81 | 4.5 | 2.46 | 2.9 | as |
| BGEG WCP10003 | 7.1 | 5.21 | 4.35 | 2.54 | 3 | as |
| BGEG WCP10004 | 7.06 | 5.31 | - | - | - | as |
| BGEG WCP10005 | 7.73 | 5.44 | 5.05 | 3.04 | 3.38 | as |
| BGEG WCP10006 | 5.43 | 4.56 | 3.79 | 2.68 | 2.61 | as |
| BGEG WCP10007 | 6.71 | 5.55 | 4.43 | 3.46 | 2.86 | as |
| BGEG WCP10008 | 7.86 | 5.95 | 4.75 | 3.2 | 3.55 | as |
| BGEG WCP10009 | 6.55 | 5.5 | 4.3 | 2.77 | 2.76 | as |
| BGEG WCP10010 | 5.85 | 4.28 | 3.56 | 2.23 | 2.54 | as |

Table S10. Dimensions of *Schwagerispira subcircularis* (Yang & Xu, 1966).

| Registration no. | Length | Width | Thickness | Preservation |
| --- | --- | --- | --- | --- |
| BGEG WCP10012 | 7.83 | 7.27 | 5.16 | as |
| BGEG WCP10013 | 7.45 | 7.14 | 5.41 | as |
| BGEG WCP10014 | 8.27 | 7.77 | 5.77 | as |
| BGEG WCP10015 | 7.02 | 6.63 | 5.2 | as |

Table S11. Dimensions of *Schwagerispira fuchsi* (Koken, 1900)

| Registration no. | Length | Width | Thickness | Preservation |
| --- | --- | --- | --- | --- |
| BGEG LDP10001 | 6.73 | 5.67 | 4.75 | as |
| BGEG LDP10002 | 7.06 | 6.54 | 4.82 | as |
| BGEG LDP10003 | 6.45 | 5.09 | 4.15 | as |

Table S12. Dimensions of *Paralepismatina semiconica* Yang & Xu, 1966

| Registration no. | Length | Width | Thickness | Preservation |
| --- | --- | --- | --- | --- |
| BGEG WCP10076 | 5.39 | 6.66 | 4.77 | as |
| BGEG LDP10064 | 6.61 | 12.79 | - | vv |
| BGEG LDP10065 | 5.43 | 7.53 | - | vv |
| BGEG LDP10066 | 5.71 | 9.72 | - | vv |

Table S13. Dimensions of *Thecocyrtelloidea tubulosa* Yang & Xu, 1966

| Registration no. | Length | Width | Thickness | Preservation |
| --- | --- | --- | --- | --- |
| BGEG WCP10077 | 4.3 | 5.4 | - | dv |
| BGEG LDP10067 | 6.4 | 8.16 | - | dv |
| BGEG LDP10068 | 6.28 | 8.96 | - | dv |
| BGEG LDP10069 | 4.93 | 6.89 | - | dv |
| BGEG LDP10070 | 6.21 | 8.52 | - | dv |
| BGEG LDP10071 | 5.09 | 7.54 | 6.06 | vv |
| BGEG LDP10072 | 7.1 | 9.04 | 8.1 | vv |
| BGEG LDP10073 | 7.47 | 9.16 | 8.39 | vv |
| BGEG LDP10074 | 8.25 | 8.23 | 5.66 | vv |
| BGEG LDP10076 | 4.32 | 6.27 | 3.91 | as |
| BGEG LDP10077 | 4.14 | 6.06 | 4.65 | as |
| BGEG LDP10078 | 6.57 | 8.25 | 7.3 | as |
| BGEG LDP10079 | 5.16 | 5.98 | 4.69 | as |
| BGEG LDP10080 | - | 8.84 | 9.17 | as |

Table S14. Dimensions of *Neocyrtina mixodeltidiumosa* Yang & Xu, 1966

| Registration no. | Length | Width | Thickness | Preservation |
| --- | --- | --- | --- | --- |
| BGEG LDP10083 | 4.58 | 6.93 | 5.44 | as |
| BGEG LDP10084 | 5 | 5.93 | 4.96 | as |
| BGEG LDP10085 | - | 7.77 | - | as |
| BGEG LDP10086 | 5.15 | 7.8 | 6.12 | vv |
| BGEG LDP10087 | 5.36 | 8.62 | 6.76 | vv |
| BGEG LDP10088 | 2.68 | 4.3 | - | vv |

Table S15. Dimensions of *Neocyrtina xui* sp. nov.

| Registration no. | Length | Width | Thickness | Preservation |
| --- | --- | --- | --- | --- |
| BGEG WCP10078 | 5.42 | 6.75 | 8.99 | as |
| BGEG WCP10079 | 4.67 | 5.71 | 6.83 | as |

Table S16. Dimensions of *Nudispiriferina minima* Yang & Xu, 1966.

| Registration no. | Length | Width | Thickness | Preservation |
| --- | --- | --- | --- | --- |
| BGEG WCP10080 | 6.17 | 8.86 | 4.37 | as |
| BGEG WCP10082 | 6.21 | 9.29 | - | vv |
| BGEG WCP10083 | 4.82 | 7.59 | - | vv |
| BGEG WCP10085 | 4.29 | 5.63 | - | vv |
| BGEG WCP10086 | 6.09 | 8.83 | - | vv |
| BGEG LDP10091 | 4.52 | 7.21 | - | vv |
| BGEG LDP10092 | 8.16 | 10.88 | - | vv |

Table S17. Dimensions of *Qingyenia spinosa* Yang & Xu, 1966.

| Registration no. | Length | Width | Thickness | Preservation |
| --- | --- | --- | --- | --- |
| BGEG LDP10110 | 5.72 | 7.08 | - | vv |
| BGEG LDP10111 | 5.95 | - | - | vv |
| BGEG LDP10112 | 6.86 | 7.61 | 4.36 | vv |
| BGEG LDP10113 | 5.95 | 7.44 | - | vv |
| BGEG LDP10114 | 7 | 9.15 | - | vv |
| BGEG LDP10115 | 5.78 | 6.86 | - | vv |
| BGEG LDP10116 | 3.52 | 4.57 | - | dv |
| BGEG LDP10117 | 4.88 | 6.08 | - | dv |
| BGEG LDP10118 | 5.29 | 6.51 | - | dv |
| BGEG LDP10119 | 5.66 | 8.75 | - | dv |

Table S18. Dimensions of *Lepismatina hsui* Wang, 1955.

| Registration no. | Length | Width | Thickness | Number of costae | Preservation |
| --- | --- | --- | --- | --- | --- |
| BGEG WCP10088 | 4.91 | 11.11 | 4.7 | 12 on vv | as |
| BGEG LDP10099 | 6.09 | 11.07 | 6.71 | 8 on vv | as |
| BGEG LDP10100 | 4.32 | 7.31 | 4.29 | 9 on vv | as |
| BGEG LDP10101 | 5.52 | 11.66 | 5.1 | 10 on vv | as |
| BGEG LDP10102 | 7.62 | 16.65 | 9.52 | 18 on vv | vv |
| BGEG LDP10103 | 7.26 | 13.13 | 7.98 | 14 on vv | vv |
| BGEG LDP10105 | 4.47 | 7.7 | 4.35 | 10 on vv | vv |
| BGEG LDP10106 | 8.42 | 4.62 | - | 8 on vv | vv |
| BGEG LDP10107 | 6.98 | 11.88 | - | 16 on dv | dv |
| BGEG LDP10108 | 7.83 | 15.2 | 0 | 14 on dv | dv |
| BGEG LDP10109 | 5.16 | 8.83 | - | 10 on dv | dv |

Table S19. Dimensions of *Koeveskallina bifurcata* sp. nov.

| Registration no. | Length | Width | Thickness | Preservation |
| --- | --- | --- | --- | --- |
| BGEG LDP10095 | 8.27 | 10.5 | - | vv |
| BGEG LDP10096 | 5.02 | 6.9 | - | dv |
| BGEG LDP10097 | 5.96 | 7.52 | - | dv |
| BGEG LDP10098 | 6.52 | 8 | - | dv |
| BGEG LDP10133 | 7 | 8.77 | - | dv |

Table S20. Dimensions of *Mentzelia mentzeli* (Dunker, 1851).

| Registration no. | Length | Width | Thickness | Preservation |
| --- | --- | --- | --- | --- |
| BGEG LDP10121 | 11.65 | 12.7 | 9.11 | as |
| BGEG LDP10122 | 11.44 | 13.05 | - | vv |
| BGEG LDP10123 | 19.88 | 20.57 | - | vv |
| BGEG LDP10124 | 15.1 | 15.88 | - | vv |
| BGEG LDP10125 | 12.2 | 11.8 | - | vv |
| BGEG LDP10126 | 10.37 | 12.07 | - | vv |
| BGEG LDP10127 | 10.61 | 11.8 | - | dv |
| BGEG LDP10128 | 14 | 16.91 | - | dv |
| BGEG LDP10129 | 14.42 | 16.73 | - | dv |
| BGEG LDP10130 | 14.2 | 16.94 | - | dv |
| BGEG LDP10131 | 14.5 | 17.1 | - | dv |

Table S21. Dimensions of *Angustothyris qingyanensis* sp. nov.

| Registration no. | Length | Width | Thickness | Preservation |
| --- | --- | --- | --- | --- |
| BGEG WCP10017 | 11.99 | 9.17 | 5.21 | as |
| BGEG WCP10018 | 11.55 | 8.61 | 5.22 | as |
| BGEG WCP10019 | 11.04 | 8.86 | 5.4 | as |
| BGEG WCP10020 | 12.33 | 9.46 | 5.73 | as |
| BGEG WCP10021 | 14.47 | 9.42 | - | as |
| BGEG WCP10022 | 14.2 | 10.43 | 7.01 | as |
| BGEG WCP10023 | 13.49 | 9.64 | 5.91 | as |
| BGEG WCP10024 | 12.55 | 8.52 | 5.64 | as |
| BGEG WCP10025 | 11.38 | 8.27 | 5.04 | as |
| BGEG WCP10026 | 10.8 | 7.86 | 4.84 | as |
| BGEG WCP10027 | 13.58 | 9.92 | 5.81 | as |
| BGEG WCP10028 | 11.8 | 9.34 | 6.07 | as |
| BGEG WCP10029 | 11.82 | 8.97 | 5.18 | as |
| BGEG WCP10030 | 10.46 | 8.52 | 5.3 | as |
| BGEG LDP10005 | 14.87 | 12.06 | 7.6 | as |
| BGEG LDP10006 | 19.48 | 13.97 | 8.99 | as |
| BGEG LDP10007 | 15.78 | 12.67 | 7.75 | as |
| BGEG LDP10008 | 12.9 | 9.7 | 6.53 | as |

Table S22. Dimensions of *Sacothyris angustaeformis* (Yang & Xu, 1966)

| Registration no. | Length | Width | Thickness | Preservation |
| --- | --- | --- | --- | --- |
| BGEG WCP10031 | 8.08 | 7.34 | 5.19 | as |
| BGEG LDP10009 | 7 | 7.05 | 4.65 | as |

**Supplementary Table S23**

Table S23. List of Anisian brachiopods from the other 12 faunas, from around the world analyzed in this paper.

| Species | Original species name | References |
| --- | --- | --- |
| **Southern Qilian** | | |
| *Orbiculoidea yangkangensis* Xu & Liu, 1983 | *Orbiculoidea yangkangensis* Xu & Liu, 1983 | Xu & Liu 1983 |
| *Orbiculoidea qieermaensis* Xu & Liu, 1983 | *Orbiculoidea qieermaensis* Xu & Liu, 1983 | Xu & Liu 1983 |
| *Triasorhynchia subglobulina* Xu & Liu, 1983 | *Triasorhynchia subglobulina* Xu & Liu, 1983 | Xu & Liu 1983 |
| *Costirhynchopsis rhomba* (Yang & Yin *in* Yang *et al.*, 1962) | *Septaliphoria rhomba* Yang & Yin *in* Yang *et al.*, 1962 | Yang *et al.* 1962; Jin *et al.* 1979; Xu & Liu 1983 |
| *Costirhynchopsis tienchungensis* (Yang & Yin in Yang *et al.*, 1962) | *Septaliphoria tienchungensis* Yang & Yin in Yang *et al.*, 1962 | Yang *et al.* 1962; Ding 1965; Jin *et al.* 1979; Xu & Liu 1983 |
| *Costirhynchopsis pavoplicata* Xu & Liu, 1983 | *Costirhynchopsis pavoplicata* Xu & Liu, 1983 | Xu & Liu 1983 |
| *Costirhynchopsis chuntzehoensis* (Yang & Yin *in* Yang *et al.*, 1962) | *Septaliphoria chuntzehoensis* Yang & Yin *in* Yang *et al.*, 1962 | Yang *et al.* 1962 |
| *Costirhynchopsis breviplicata* (Yang & Yin *in* Yang *et al.*, 1962) | *Septaliphoria breviplicata* Yang & Yin *in* Yang *et al.*, 1962 | Yang *et al.* 1962; Ding 1965 |
| *Nudirostralina tenuicostata* Jin, Sun & Ye *in* Jin *et al.*, 1979 | *Nudirostralina tenuicostata* Jin, Sun & Ye in Jin *et al.*, 1979 | Jin *et al.* 1979; Xu & Liu 1983 |
| *Nudirostralina lissosinus* Xu & Liu, 1983 | *Nudirostralina lissosinus* Xu & Liu, 1983 | Xu & Liu 1983 |
| *Nudirostralina longa* Jin, Sun & Ye *in* Jin *et al.*, 1979 | *Nudirostralina longa* Jin, Sun & Ye *in* Jin *et al.*, 1979 | Jin *et al.* 1979 |
| *Nudirostralina* cf. *griesbachi* (Bittner, 1899) | *Rhynchonella* cf. *griesbachi* Bittner, 1899 | Yang *et al.* 1962 |
| *Nudirostralina trinodosi* (Bittner, 1890) | *Rhynchonella trinodosi* Bittner, 1890 | Ding 1965 |
| *Qilianoconcha corcula* Jin, Sun & Ye *in* Jin *et al.*, 1979 | *Qilianoconcha corcula* Jin, Sun & Ye *in* Jin *et al.*, 1979 | Jin *et al.* 1979 |
| *Qilianoconcha opima* (Yang & Yin *in* Yang *et al.*, 1962) | *Aulacothyris opima* Yang & Yin *in* Yang *et al.*, 1962 | Yang *et al.* 1962; Ding 1965; Jin *et al.* 1979; Xu & Liu 1983 |
| *Qilianoconcha*? ‘*refractifrons*’ (Bittner, 1890) | *Rhynchonella refractifrons* Bittner, 1890 | Jin *et al.* 1979 |
| *Lissorhynchia minuta* Xu & Liu, 1983 | *Lissorhynchia minuta* Xu & Liu, 1983 | Xu & Liu 1983 |
| *Qingthyris variablis* Xu & Liu, 1983 | *Qingthyris variablis* Xu & Liu, 1983 | Xu & Liu 1983 |
| *Qingthyris mulica* Sun, Jin & Ye *in* Jin *et al.*, 1979 | *Oxycolpella mulica* Sun, Jin & Ye *in* Jin *et al.*, 1979 | Jin *et al.* 1979 |
| *Schwagerispira subcircularis* (Yang & Xu, 1966) | *Neoretzia subcircularis* Yang & Xu, 1966 | Xu & Liu 1983 |
| *Schwagerispira beneckei* (Bittner, 1890) | *Retzia beneckei* Bittner, 1890 | Yang *et al.* 1962 |
| *Athyrorhynchia athyroformis* Xu & Liu, 1983 | *Athyrorhynchia athyroformis* Xu & Liu, 1983 | Xu & Liu 1983 |
| *Thyratryaria pinguis* Xu & Liu, 1983 | *Thyratryaria pinguis* Xu & Liu, 1983 | Xu & Liu 1983 |
| *Thyratryaria depressa* Xu & Liu, 1983 | *Thyratryaria depressa* Xu & Liu, 1983 | Xu & Liu 1983 |
| *Thyratryaria pertumida* Xu & Liu, 1983 | *Thyratryaria pertumida* Xu & Liu, 1983 | Xu & Liu 1983 |
| *Sulcatinella sulcata* Dagys, 1974 | *Sulcatinella sulcata* Dagys, 1974 | Xu & Liu 1983 |
| *Sulcatinella ovata* Xu & Liu, 1983 | *Sulcatinella ovata* Xu & Liu, 1983 | Xu & Liu 1983 |
| *Parasulcatinella obesus* Xu & Liu, 1983 | *Parasulcatinella obesus* Xu & Liu, 1983 | Xu & Liu 1983 |
| *Eoantiptychia pentagona* (Yang & Yin *in* Yang *et al.*, 1962) | *Antiptychina pentagona* Yang & Yin *in* Yang *et al.*, 1962 | Yang *et al.* 1962; Xu & Liu 1983 |
| *Eoantiptychia*? *oblata* (Yang & Yin *in* Yang *et al.*, 1962) | *Antiptychina oblata* Yang & Yin *in* Yang *et al.*, 1962 | Yang *et al.* 1962 |
| *Eoantiptychia*? *arta* (Yang & Yin *in* Yang *et al.*, 1962) | *Antiptychina arta* Yang & Yin *in* Yang *et al.*, 1962 | Yang *et al.* 1962 |
| *Parantiptychia robusta* (Yang & Yin *in* Yang *et al.*, 1962) | *Antiptychina robusta* Yang & Yin *in* Yang *et al.*, 1962 | Yang *et al.* 1962; Xu & Liu 1983 |
| *Parantiptychia sulcata* Xu & Liu, 1983 | *Parantiptychia sulcata* Xu & Liu, 1983 | Xu & Liu 1983 |
| *Parantiptychia nanqilianensis* Xu & Liu, 1983 | *Parantiptychia nanqilianensis* Xu & Liu, 1983 | Xu & Liu 1983 |
| *Parantiptychia biangulatoplicata* Xu & Liu, 1983 | *Parantiptychia biangulatoplicata* Xu & Liu, 1983 | Xu & Liu 1983 |
| *Parantiptychia elongata* Xu & Liu, 1983 | *Parantiptychia elongata* Xu & Liu, 1983 | Xu & Liu 1983 |
| *Parantiptychia minima* Xu & Liu, 1983 | *Parantiptychia minima* Xu & Liu, 1983 | Xu & Liu 1983 |
| *Angustothyris concava* Jin, Sun & Ye *in* Jin *et al.*, 1979 | *Angustothyris concava* Jin, Sun & Ye *in* Jin *et al.*, 1979 | Jin *et al.*, 1979 |
| *Tosuhuthyris lens* (Jin, Sun & Ye *in* Jin *et al.*, 1979) | ‘*Qilianoconcha*’ *lens* Jin, Sun & Ye *in* Jin *et al.*, 1979 | Jin *et al.* 1979 |
| *Tosuhuthyris*? *curvifrons* (Jin, Sun & Ye *in* Jin *et al.*, 1979) | ‘*Qilianoconcha*’ *curvifrons* Jin, Sun & Ye *in* Jin *et al.*, 1979 | Jin *et al.*, 1979 |
| *Tosuhuthyris*? ‘*angusta*’ (von Schlotheim, 1820) | *Terebratulites angustus* von Schlotheim, 1820 | Yang *et al.* 1962; Ding 1965 |
| *Sinucostella obscura* (Yang & Yin *in* Yang *et al.*, 1962) | *Aequspiriferina obscura* Yang & Yin *in* Yang *et al.*, 1962 | Yang *et al.* 1962; Xu & Liu 1983 |
| *Pseudospiriferina variabilis* Yang & Xu, 1966 | *Pseudospiriferina variabilis* Yang & Xu, 1966 | Xu & Liu 1983 |
| *Pseudospiriferina biplicata* Xu & Liu, 1983 | *Pseudospiriferina biplicata* Xu & Liu, 1983 | Xu & Liu 1983 |
| *Pseudospiriferina pauciplicata* (Yang & Yin *in* Yang *et al.*, 1962) | *Spiriferina pauciplicata* Yang & Yin *in* Yang *et al.*, 1962 | Yang *et al.* 1962; Xu & Liu 1983 |
| *Pseudospiriferina lipoldiformis* (Yang & Yin *in* Yang *et al.*, 1962) | *Spiriferina lipoldiformis* Yang & Yin *in* Yang *et al.*, 1962 | Yang *et al.* 1962; Jin *et al.* 1979; Xu & Liu 1983 |
| *Pseudospiriferina tsinghaiensis* (Yang & Yin *in* Yang *et al.*, 1962) | *Spiriferina tsingihaiensis* Yang & Yin *in* Yang *et al.*, 1962 | Yang *et al.* 1962; Ding 1965; Jin *et al.* 1979; Xu & Liu 1983 |
| *Pseudospiriferina bifurcata* (Yang & Yin *in* Yang *et al.*, 1962) | *Spiriferina bifurcata* Yang & Yin *in* Yang *et al.*, 1962 | Yang *et al.* 1962; Ding 1965 |
| *Altoplicatella altiarea* Xu & Liu, 1983 | *Altoplicatella altiarea* Xu & Liu, 1983 | Xu & Liu 1983 |
| *Yangkongia planofolda* Xu & Liu, 1983 | *Yangkongia planofolda* Xu & Liu, 1983 | Xu & Liu 1983 |
| *Yangkongia qieermaensis* Xu & Liu, 1983 | *Yangkongia qieermaensis* Xu & Liu, 1983 | Xu & Liu 1983 |
| *Yangkongia zhihemaensis* Xu & Liu, 1983 | *Yangkongia zhihemaensis* Xu & Liu, 1983 | Xu & Liu 1983 |
| *Qispiriferina subrotunda* Xu & Liu, 1983 | *Qispiriferina subrotunda* Xu & Liu, 1983 | Xu & Liu 1983 |
| *Paralepismatina semiconica* Yang & Xu, 1966 | *Paralepismatina semiconica* Yang & Xu, 1966 | Xu & Liu 1983 |
| *Hirsutella extraruga* (Yang & Yin *in* Yang *et al.*, 1962) | *Aequspiriferina extraruga* Yang & Yin *in* Yang *et al.*, 1962 | Yang *et al.* 1962; Xu & Liu 1983 |
| *Hirsutella*?‘*multicostata*’ (Yang & Xu, 1966) | *Mentzelia multicostata* Yang & Xu, 1966 | Xu & Liu 1983 |
| *Lepismatina qilianensis* Xu & Liu, 1983 | *Lepismatina qilianensis* Xu & Liu, 1983 | Xu & Liu 1983 |
| *Lepismatina sinucosta* Xu & Liu, 1983 | *Lepismatina sinucosta* Xu & Liu, 1983 | Xu & Liu 1983 |
| *Aequspiriferina multiplicata* Yang & Yin *in* Yang *et al.*, 1962 | *Aequspiriferina multiplicata* Yang & Yin *in* Yang *et al.*, 1962 | Yang *et al.* 1962; Ding 1965; Jin *et al.* 1979; Xu & Liu 1983 |
| **Central Qinghai** | | |
| *Costirhynchopsis rhomba* (Yang & Yin *in* Yang *et al.*, 1962) | *Septaliphoria rhomba* Yang & Yin *in* Yang *et al.*, 1962 | Sun & Ye 1982 |
| *Costirhynchopsis tienchungensis* (Yang & Yin *in* Yang *et al.*, 1962) | *Septaliphoria tienchungensis* Yang & Yin *in* Yang *et al.*, 1962 | Sun & Ye 1982 |
| *Paranudirostralina bifurcata* Sun & Ye, 1982 | *Paranudirostralina bifurcata* Sun & Ye, 1982 | Sun & Ye 1982 |
| *Nudirostralina subsphaerica* Sun & Ye, 1982 | *Nudirostralina subsphaerica* Sun & Ye, 1982 | Sun & Ye 1982 |
| *Diholkorhynchia sinensis* (Koken, 1900) | *Rhynchonella sinensis* Koken, 1900 | Sun & Ye 1982 |
| *Abrekia applanata* Sun & Ye, 1982 | *Abrekia applanata* Sun & Ye, 1982 | Sun & Ye 1982 |
| *Uniplicatorhynchia trigona* Sun & Ye, 1982 | *Uniplicatorhynchia trigona* Sun & Ye, 1982 | Sun & Ye 1982 |
| *Nucleusorhynchia typica* Sun & Ye, 1982 | *Nucleusorhynchia typica* Sun & Ye, 1982 | Sun & Ye 1982 |
| *Qilianoconcha opima* (Yang & Yin *in* Yang *et al.*, 1962) | *Aulacothyris opima* Yang & Yin *in* Yang *et al.*, 1962 | Jin *et al.* 1979 |
| *Schwagerispira pinguis* Sun & Ye 1982 | *Schwagerispira pinguis* Sun & Ye 1982 | Sun & Ye 1982 |
| *Schwagerispira subcircularis* (Yang & Xu, 1966) | *Neoretzia subcircularis* Yang & Xu, 1966 | Sun & Ye 1982 |
| *Schwagerispira fuchsi* (Koken, 1900) | *Retzia fuchsi* Koken, 1900 | Sun & Ye 1982 |
| *Anisactinella qinghaica* Sun, Jin & Ye *in* Jin *et al.*, 1979 | *Anisactinella qinghaica* Sun, Jin & Ye *in* Jin *et al.*, 1979 | Jin *et al.* 1979 |
| *Tosuhuthyris sulcus* Sun & Ye, 1982 | *Tosuhuthyris sulcus* Sun & Ye, 1982 | Sun & Ye 1982 |
| *Tosuhuthyris lens* (Jin, Sun & Ye *in* Jin *et al.*, 1979) | ‘*Qilianoconcha*’ *lens* Jin, Sun & Ye *in* Jin *et al.*, 1979 | Sun & Ye 1982 |
| *Tosuhuthyris obliquus* Sun & Ye, 1982 | *Tosuhuthyris obliquus* Sun & Ye, 1982 | Sun & Ye 1982 |
| *Pirithyris pius* Sun & Ye, 1982 | *Pirithyris pius* Sun & Ye, 1982 | Sun & Ye 1982 |
| *Qinghaispiriferina obovata* Sun & Ye, 1982 | *Qinghaispiriferina obovata* Sun & Ye, 1982 | Sun & Ye 1982 |
| *Sinucosta longa* Sun & Ye, 1982 | *Sinucosta longa* Sun & Ye, 1982 | Sun & Ye 1982 |
| *Pseudospiriferina pauciplicata* (Yang & Yin *in* Yang *et al.*, 1962) | *Spiriferina pauciplicata* Yang & Yin *in* Yang *et al.*, 1962 | Sun & Ye 1982 |
| *Pseudospiriferina tsinghaiensis* (Yang & Yin *in* Yang *et al.*, 1962) | *Spiriferina tsinghaiensis* Yang & Yin *in* Yang *et al.*, 1962 | Sun & Ye 1982 |
| *Madoia rostrata* Sun & Ye, 1982 | *Madoia rostrata* Sun & Ye, 1982 | Sun & Ye 1982 |
| *Koeveskallina* *epichara* Sun & Ye, 1982 | *Koeveskallina* *epichara* Sun & Ye, 1982 | Sun & Ye 1982 |
| *Koeveskallina* *media* Sun & Ye, 1982 | *Koeveskallina* *media* Sun & Ye, 1982 | Sun & Ye 1982 |
| *Hirsutella rectimarginata* Sun & Ye, 1982 | *Hirsutella rectimarginata* Sun & Ye, 1982 | Sun & Ye 1982 |
| *Mentzelia minor* Sun & Ye, 1982 | *Mentzelia minor* Sun & Ye, 1982 | Sun & Ye 1982 |
| **Western Qinling*** | | |
| *Costirhynchopsis tienchungensis* (Yang & Yin *in* Yang *et al.*, 1962) | *Septaliphoria tienchungensis* Yang & Yin *in* Yang *et al.*, 1962 | Xu 1992 |
| *Costirhynchopsis pavoplicata* Xu & Liu, 1983 | *Costirhynchopsis pavoplicata* Xu & Liu, 1983 | Xu 1992 |
| *Costirhynchopsis sinensis* (Yang & Xu, 1966) | *Septaliphoria sinensis* Yang & Xu, 1966 | Xu 1992 |
| *Diholkorhynchia sinensis* (Koken, 1900) | *Rhynchoenlla sinensis* Koken, 1900 | Xu 1992 |
| *Diholkorhynchia minucosta* Xu, 1992 | *Diholkorhynchia minucosta* Xu, 1992 | Xu 1992 |
| *Nudirostralina lissosinus* Xu & Liu, 1983 | *Nudirostralina lissosinus* Xu & Liu, 1983 | Xu 1992 |
| *Qilianoconcha corcula* Jin, Sun & Ye *in* Jin *et al.*, 1979 | *Qilianoconcha corcula* Jin, Sun & Ye *in* Jin *et al.*, 1979 | Xu 1992 |
| ‘*Caucasorhynchella subfissicostata*’ (Yang & Xu, 1966) | *Crurirhynchia subfissicostata* Yang & Xu, 1966 | Xu 1992 |
| *Crurirhynchia*? *subglobia* Xu, 1992 | *Crurirhynchia subglobia* Xu, 1992 | Xu 1992 |
| *Spirigerellina subquadrata* (Yang & Xu, 1966) | ‘*Athyris*’ *subquadrata* Yang & Xu, 1966 | Xu 1992 |
| *Schwagerispira subcircularis* (Yang & Xu, 1966) | *Neoretzia subcircularis* Yang & Xu, 1966 | Xu 1992 |
| *Sacothyris angustaeformis* (Yang & Xu, 1966) | *Aulacothyris angustaeformis* Yang & Xu, 1966 | Xu 1992 |
| *Parantiptychia sulcata* Xu & Liu, 1983 | *Parantiptychia sulcata* Xu & Liu, 1983 | Xu 1992 |
| *Sulcatinella ovata* Xu & Liu, 1983 | *Sulcatinella ovata* Xu & Liu, 1983 | Xu 1992 |
| *Thyratryaria depressa* Xu & Liu, 1983 | *Thyratryaria depressa* Xu & Liu, 1983 | Xu 1992 |
| *Coenothyris elongata* (Yang & Xu, 1966) | *Adygella elongata* Yang & Xu, 1966 | Xu 1992 |
| *Tosuhuthyris lens* (Jin, Sun & Ye *in* Jin *et al.*, 1979) | ‘*Qilianoconcha*’ *lens* Jin, Sun & Ye *in* Jin *et al.*, 1979 | Xu 1992 |
| *Hirsutella extraruga* (Yang & Yin *in* Yang *et al.*, 1962) | *Aequspiriferina extraruga* Yang & Yin *in* Yang *et al.*, 1962 | Xu 1992 |
| *Mentzelia mentzeli* (Dunker, 1851) | *Spirifer mentzeli* Dunker, 1851 | Xu 1992 |
| *Dagyssia multicostata* (Yang & Xu, 1966) | *Mentzelia multicostata* Yang & Xu, 1966 | Xu 1992 |
| *Mentzelia*? *paucicostata* Yang & Xu, 1966 | *Mentzelia paucicostata* Yang & Xu, 1966 | Xu 1992 |
| *Pseudospiriferina pauciplicata* (Yang & Yin *in* Yang *et al.*, 1962) | *Spiriferina pauciplicata* Yang & Yin *in* Yang *et al.*, 1962 | Xu 1992 |
| *Pseudospiriferina variabilis* Yang & Xu, 1966 | *Pseudospiriferina variabilis* Yang & Xu, 1966 | Xu 1992 |
| *Qispiriferina subrotunda* Xu & Liu, 1983 | *Qispiriferina subrotunda* Xu & Liu, 1983 | Xu 1992 |
| **Hungary** | | |
| *Discinisca* sp. | *Discinisca* sp. | Pálfy 2003 |
| ‘*Lingula*’ cf. *tenuissima* Bronn, 1837 | *Lingula* cf. *tenuissima* Bronn, 1837 | Pálfy 2003 |
| *Tetractinella trigonella* (von Schlotheim, 1820) | *Terebratulites trigonellus* von Schlotheim, 1820 | Pálfy 2003 |
| *Schwagerispira* *mojsisovicsi* (Böckh, 1872) | *Retzia mojsisovicsi* Böckh, 1872 | Pálfy 2003 |
| *Schwagerispira schwageri* (Bittner, 1890) | *Retzia schwageri* Bittner, 1890 | Pálfy 2003 |
| *Pexidella sturi* (Böckh, 1872) | *Spirigera sturi* Böckh, 1872 | Voros & Pálfy 1989 |
| *Norella refractifrons* (Bittner, 1890) | *Rhynchonella refactifrons* Bittner, 1890 | Voros & Pálfy 1989 |
| *Norella*? sp. | *Norella*? sp. | Pálfy 2003 |
| *Costirhynchopsis mentzeli* (Buch, 1843) | *Rhynchoenlla mentzeli* Buch, 1843 | Pálfy 1988, 2003 |
| *Decurtella decurtata* (Girard, 1843) | *Terebratula decurtata* Girard, 1843 | Pálfy 1988, 2003 |
| *Decurtella* cf. *illyrica* (Bittner, 1903) | *Rhynchonella* *illyrica* Bittner, 1903 | Pálfy 2003 |
| *Nudirostralina trinodosi* (Bittner, 1890) | *Rhynchonella trinodosi* Bittner, 1890 | Pálfy 1988, 2003 |
| *Volirhynchia vivida* (Bittner, 1890) | *Rhynchonella decurtata* var. *vivida* Bittner, 1890 | Pálfy 1988, 2003 |
| *Volirhynchia projectifrons* (Bittner, 1890) | *Rhynchonella projectifrons* Bittner, 1890 | Pálfy 1988, 2003 |
| *Volirhynchia* *productifrons* (Bittner, 1890) | *Rhynchonella productifrons* Bittner, 1890 | Pálfy 2003 |
| *Volirhynchia tommasi* (Bittner, 1890) | *Rhynchonella tommasi* Bittner, 1890 | Pálfy 1988, 2003 |
| *Caucasorhynchia* *altaplecta* (Böckh, 1872) | *Rhynchonella altaplecta* Böckh, 1872 | Pálfy 1988 |
| *Trigonirhynchella attilina* (Bittner, 1890) | *Rhynchonella attilina* Bittner, 1890 | Pálfy 1988, 2003 |
| *Homoeorhynchia*? sp. | *Homoeorhynchia*? sp. | Pálfy 2003 |
| *Holcorhynchella delicatula* (Bittner, 1890) | *Rhynchonella delicatula* Bittner, 1890 | Pálfy 1988, 2003 |
| *Lepismatina manca* (Bittner, 1890) | *Spiriferina manca* Bittner, 1890 | Pálfy 2003 |
| *Dinarispira avarica* (Bittner, 1890) | *Spiriferina avarica* Bittner, 1890 | Pálfy 2003 |
| *Dinarispira* cf. *dinarica* (Bittner, 1890) | *Spiriferina pia* var. dinarica Bittner, 1890 | Pálfy 2003 |
| *Sinucosta pectinata* (Bittner, 1890) | *Spiriferina pectinata* Bittner, 1890 | Pálfy 2003 |
| *Punctospirella fragilis* (von Schlotheim, 1814) | *Terebratulites* *fragilis* von Schlotheim, 1814 | Pálfy 2003 |
| *Mentzelia ampla* (Bittner, 1890) | *Spiriferina (Mentzelia) ampla* Bittner, 1890 | Voros & Pálfy 1989; Gaetani & Mantovani 2015 |
| *Mentzelia mentzeli* (Dunker, 1851) | *Spirifer mentzeli* Dunker, 1851 | Pálfy 2003 |
| *Mentzelia balatonica* (Bittner, 1890) | *Spiriferina balatonica* Bittner, 1890 | Pálfy 2003 |
| *Koeveskallina koeveskalyensis* (Stur, 1865) | *Spiriferina koeveskalyensis* Stur, 1865 | Pálfy 2003 |
| *Koeveskallina pannonica* (Bittner, 1890) | *Spiriferina* (*Mentzelia*) *pannonica* Bittner, 1890 | Voros & Pálfy 1989; Gaetani & Mantovani 2015 |
| *Ptychomentzelia ptychitiphila* (Bittner, 1890) | *Spiriferina ptychitiphila* Bittner, 1890 | Bittner, 1890; Gaetani & Mantovani 2015 |
| *Dagyssia paleotypus* (Loretz, 1875) | *Spiriferina paleotypus* Loretz, 1875 | Pálfy 2003 |
| *Thecocyrtella horogensis* Pálfy, 2003 | *Thecocyrtella horogensis* Pálfy, 2003 | Pálfy 2003 |
| *Coenothyris vulgaris* (von Schlotheim, 1820) | *Terebratula vulgaris* von Schlotheim, 1820 | Pálfy 2003 |
| *Coenothyris* cf. *cuccensis* Bittner, 1903 | *Terebratula* (*Coenothyris*) cf. *cuccensis* Bittner, 1903 | Pálfy 2003 |
| *Coenothyris* cf. *kraffti* Bittner, 1903 | *Terebratula* (*Coenothyris*) cf. *kraffti* Bittner, 1903 | Pálfy 2003 |
| *Coenothyris*? aff. *kraffti* Bittner, 1903 | *Terebratula* (*Coenothyris*) aff. *kraffti* Bittner, 1903 | Pálfy 2003 |
| *Sulcatinella incrassata* (Bittner, 1890) | *Waldheimia* (*Aulacothyris*) *angusta* var. *incrassata* Bittner, 1890 | Pálfy 2003 |
| *Angustothyris*? *angustaeformis* (Böckh, 1872) | *Waldheimia angustaeformis* Böckh, 1972 | Pálfy 2003 |
| *Angustothyris*? sp. | *Angustothyris*? sp. | Pálfy 2003 |
| **Northern Caucasus** | | |
| *Costirhynchopsis mentzeli* (Buch, 1843) | *Rhynchonella mentzeli* Buch, 1843 | Dagys & Robinson 1973; Dagys 1974 |
| *Decurtella decurtata* (Girard, 1843) | *Terebratula decurtata* Girard, 1843 | Dagys & Robinson 1973; Dagys 1974 |
| *Holcorhynchella proclivis* (Bittner,1903) | *Rhynchonella proclivis* Bittner, 1903 | Dagys & Robinson 1973 |
| *Holcorhynchella delicatula* (Bittner, 1890) | *Rhynchonella delicatula* Bittner, 1890 | Dagys 1974 |
| *Norella refractifrons* (Bittner, 1890) | *Rhynchonella refactifrons* Bittner, 1890 | Dagys 1974 |
| *Nudirostralina trinodosi* (Bittner, 1890) | *Rhynchonella trinodosi* Bittner, 1890 | Dagys & Robinson 1973; Dagys 1974 |
| *Volirhynchia productifrons* (Bittner, 1890) | *Rhynchonella productifrons* Bittner, 1890 | Dagys 1974 |
| *Volirhynchia volitans* (Bittner, 1890) | *Rhynchonella volitans* Bittner, 1890 | Dagys 1974 |
| *Pexidella sturi* (Böckh, 1872) | *Spirigera sturi* Böckh, 1872 | Dagys & Robinson 1973; Dagys 1974 |
| *Pexidella marmorea* (Bittner, 1890) | *Spirigera marmorea* Bittner, 1890 | Dagys 1974 |
| *Tetractinella trigonella* (von Schlotheim, 1820) | *Terebratulites trigonellus* von Schlotheim, 1820 | Dagys & Robinson 1973; Dagys 1974 |
| *Lepismatina manca* (Bittner, 1890) | *Spiriferina manca* Bittner, 1890 | Dagys 1974 |
| *Dinarispira pia* (Bittner, 1890) | *Spiriferina pia* Bittner, 1890 | Dagys 1974 |
| *Dinarispira dinarica* (Bittner, 1890) | *Spiriferina pia* var. *dinarica* Bittner, 1890 | Dagys & Robinson 1973 |
| *Koeveskallina koeveskalyensis* (Stur, 1865) | *Spiriferina koeveskalyensis* Stur, 1865 | Dagys & Robinson 1973; Dagys 1974 |
| *Mentzelia mentzeli* (Dunker, 1851) | *Spirifer mentzeli* Dunker, 1851 | Dagys 1974 |
| *Punctospirella fragilis* (von Schlotheim, 1814) | *Terebratulites fragilis* von Schlotheim, 1814 | Dagys & Robinson 1973; Dagys 1974 |
| *Sinucosta pectinata* (Bittner, 1890) | *Spiriferina pectinata* Bittner, 1890 | Dagys 1974 |
| *Angustothyris angustaeformis* (Böckh, 1872) | *Waldheimia angustaeformis* Böckh, 1972 | Dagys 1974 |
| *Coenothyris vulgaris* (von Schlotheim, 1820) | *Terebratula vulgaris* von Schlotheim, 1820 | Dagys 1974 |
| *Sulcatinella sulcata* Dagys, 1974 | *Sulcatinella sulcata* Dagys, 1974 | Dagys 1974 |
| *Sulcatinella waehneri* (Bittner, 1903) | *Aulcaothyris waehneri* Bittner, 1903 | Dagys 1974 |
| *Zeilleria babukensis* Dagys, 1974 | *Zeilleria babukensis* Dagys, 1974 | Dagys 1974 |
| *Praecubanothyris obtusus* Dagys, 1974 | *Praecubanothyris obtusus* Dagys, 1974 | Dagys 1974 |
| **Alps** | | |
| ‘*Lingula*’ *tenuissima* Bronn, 1837 | *Lingula tenuissima* Bronn, 1837 | Bittner 1890 |
| *Costirhynchopsis mentzeli* (Buch, 1843) | *Rhynchoenlla mentzeli* Buch, 1843 | Bittner 1890 |
| *Decurtella decurtata* (Girard, 1843) | *Terebratula decurtata* Girard, 1843 | Bittner 1890 |
| *Nudirostralina trinodosi* (Bittner, 1890) | *Rhynchonella trinodosi* Bittner, 1890 | Bittner 1890 |
| *Norella refractifrons* (Bittner, 1890) | *Rhynchonella refactifrons* Bittner, 1890 | Bittner 1890 |
| *Norella retractifrons* (Bittner, 1890) | *Rhynchonella retractifrons* Bittner, 1890 | Bittner 1890 |
| *Holcorhynchella delicatula* (Bittner, 1890) | *Rhynchonella delicatula* Bittner, 1890 | Bittner 1890 |
| *Volirhynchia teutonica* (Bittner, 1890) | *Rhynchonella teutonica* Bittner, 1890 | Bittner 1890 |
| *Volirhynchia tommasi* (Bittner, 1890) | *Rhynchonella tommasi* Bittner, 1890 | Bittner 1890 |
| *Volirhynchia volitans* (Bittner, 1890) | *Rhynchonella volitans* Bittner, 1890 | Bittner 1890 |
| *Volirhynchia productiforns* (Bittner, 1890) | *Rhynchonella productiforns* Bittner, 1890 | Bittner 1890 |
| *Volirhynchia vivida* (Bittner, 1890) | *Rhynchonella decurtata* var. *vivida* Bittner, 1890 | Bittner 1890 |
| *Volirhynchia projectifrons* (Bittner, 1890) | *Rhynchonella projectifrons* Bittner, 1890 | Bittner 1890 |
| ‘*Rhynchonella*’ *arcula* Bittner, 1890 | *Rhynchonella arcula* Bittner, 1890 | Bittner 1890 |
| ‘*Rhynchonella*’ *cimbrica* Bittner, 1890 | *Rhynchonella* *cimbrica* Bittner, 1890 | Bittner 1890 |
| ‘*Rhynchonella*’ *pironiana* Bittner, 1890 | *Rhynchonella pironiana* Bittner, 1890 | Bittner 1890 |
| ‘*Rhynchonella*’ *ottomana* Bittner, 1890 | *Rhynchonella ottomana* Bittner, 1890 | Bittner 1890 |
| *Anisactinella venetiana* (Bittner, 1890) | *Spirigera venetiana* Bittner, 1890 | Bittner 1890 |
| *Tetractinella trigonella* (von Schlotheim, 1820) | *Terebratulites trigonellus* von Schlotheim, 1820 | Bittner 1890 |
| *Tetractinella tetractis* (Loretz, 1875) | *Rhynchonella tetractis* Loretzi, 1875 | Bittner 1890 |
| *Pexidella sturi* (Böckh, 1872) | *Spirigera sturi* Böckh, 1872 | Bittner 1890 |
| *Schwagerispira beneckei* (Bittner, 1890) | *Retzia beneckei* Bittner, 1890 | Bittner 1890 |
| *Schwagerispira mojsisovicsi* (Böckh, 1872) | *Retzia* mojsisovicsi Böckh, 1872 | Bittner 1890 |
| *Schwagerispira schwageri* (Bittner, 1890) | *Retzia schwageri* Bittner, 1890 | Bittner 1890 |
| ‘*Spirigera*’ *forojulensis* Bittner, 1890 | *Spirigera forojulensis* Bittner, 1890 | Bittner 1890 |
| *Angustothyris angustaeformis* (Böckh, 1872) | *Waldheimia angustaeformis* Böckh, 1972 | Bittner 1890 |
| *Coenothyris vulgaris* (von Schlotheim, 1820) | *Terebratula vulgaris* von Schlotheim, 1820 | Bittner 1890 |
| *Silesiathyris angusta* (von Schlotheim, 1820) | *Terebratulites angustus* von Schlotheim, 1820 | Bittner 1890 |
| *Parecubanothyris* *sulcifer* (Schauroth, 1855) | *Terebratula sulcifer* Schauroth, 1855 | Bittner 1890; Dagys 1974 |
| ‘*Terebratula*’ *laricimontana* Bittner, 1890 | *Terebratula* *laricimontana* Bittner, 1890 | Bittner 1890 |
| *Dinarispira pia* (Bittner, 1890) | *Spiriferina pia* Bittner, 1890 | Bittner 1890 |
| *Dinarispira dinarica* (Bittner, 1890) | *Spiriferina pia* var. *dinarica* Bittner, 1890 | Bittner 1890 |
| *Punctospirella fragilis* (von Schlotheim, 1814) | *Terebratulites fragilis* von Schlotheim, 1814 | Bittner 1890 |
| *Hirsutella canavarica* (Tommasi, 1885) | *Spiriferina canavarica* Tommasi, 1885 | Bittner 1890 |
| *Sinucosta pectinata* (Bittner, 1890) | *Spiriferina pectinata* Bittner, 1890 | Bittner 1890 |
| *Koeveskallina koeveskalyensis* (Stur, 1865) | *Spiriferina koeveskalyensis* Stur, 1865 | Bittner 1890 |
| *Dagyssia paleotypus* (Loretz, 1875) | *Spiriferina paleotypus* Loretz, 1875 | Bittner 1890 |
| *Koeveskallina pannonica* (Bittner, 1890) | *Spiriferina (Mentzelia) pannonica* Bittner, 1890 | Bittner 1890 |
| *Mentzelia mentzeli* (Dunker, 1851) | *Spirifer mentzeli* Dunker, 1851 | Bittner 1890 |
| *Ptychomentzelia ptychitiphila* (Bittner, 1890) | *Spiriferina ptychitiphila* Bittner, 1890 | Bittner 1890 |
| ‘*Spiriferina*’ *terzadica* Bittner, 1890 | *Spiriferina terzadica* Bittner, 1890 | Bittner 1890 |
| **New Zealand** | | |
| *Aorhynchia ohaiensis* MacFarlan, 1992 | *Aorhynchia ohaiensis* MacFarlan, 1992 | MacFarlan 1992 |
| *Aorhynchia abyssensis* MacFarlan, 1992 | *Aorhynchia abyssensis* MacFarlan, 1992 | MacFarlan 1992 |
| *Aorhynchia* cf. *ohaiensis* MacFarlan, 1992 | *Aorhynchia* cf. *ohaiensis* MacFarlan, 1992 | MacFarlan 1992 |
| *Aparimarhynchia dunrobinensis* MacFarlan, 1992 | *Aparimarhynchia dunrobinensis* MacFarlan, 1992 | MacFarlan 1992 |
| *Aparimarhynchia takitimuensis* MacFarlan, 1992 | *Aparimarhynchia takitimuensis* MacFarlan, 1992 | MacFarlan 1992 |
| *Wairakirhynchia morleyensis* MacFarlan, 1992 | *Wairakirhynchia morleyensis* MacFarlan, 1992 | MacFarlan 1992 |
| *Wairakirhynchia* cf. *morleyensis* MacFarlan, 1992 | *Wairakirhynchia* cf. *morleyensis* MacFarlan, 1992 | MacFarlan 1992 |
| *Wairakirhynchia etaliana* MacFarlan, 1992 | *Wairakirhynchia etaliana* MacFarlan, 1992 | MacFarlan 1992 |
| *Wairakirhynchia susvallensis* MacFarlan, 1992 | *Wairakirhynchia susvallensis* MacFarlan, 1992 | MacFarlan 1992 |
| *Maorirhynchia nelsonensis* MacFarlan, 1992 | *Maorirhynchia nelsonensis* MacFarlan, 1992 | MacFarlan 1992 |
| *Maorirhynchia* cf. *nelsonensis* MacFarlan, 1992 | *Maorirhynchia* cf. *nelsonensis* MacFarlan, 1992 | MacFarlan 1992 |
| **Iran** | | |
| *Costirhynchopsis ruttneri* Siblík, 1991 | *Costirhynchopsis ruttneri* Siblík, 1991 | Siblík 1991 |
| *Tetractinella trigonella* (von Schlotheim, 1820) | *Terebratulites trigonellus* von Schlotheim, 1820 | Siblík 1991 |
| *Dareithyris vulgaris* Siblík, 1991 | *Dareithyris vulgaris* Siblík, 1991 | Siblík 1991 |
| *Punctospirella* aff. *fragilis* (von Schlotheim, 1814) | *Terebratulites* aff. *fragilis* von Schlotheim, 1814 | Siblík 1991 |
| *Tethyspira persis* Siblík, 1991 | *Tethyspira persis* Siblík, 1991 | Gaetani 2016 |
| Athyridoid gen. and sp. indet. | Athyridoid gen. and sp. indet. | Siblík 1991 |
| **Yemen** | | |
| *Nudirostralina mutabilis* (Stoliczka, 1866) | *Rhynchonella mutabilis* Stoliczka, 1866 | Gaetani *et al.* 2018 |
| *Spirigerellina stoliczkai* (Bittner, 1899) | *Spirigera* (*Athyris*) *stoliczkai* Bittner, 1899 | Gaetani *et al.* 2018 |
| *Adygella socotrana* Gaetani *in* Gaetani *et al.*,2018 | *Adygella socotrana* Gaetani *in* Gaetani *et al.*, 2018 | Gaetani *et al.* 2018 |
| *Lepismatina lilangensis* (Stoliczka, 1866) | *Spirifer* (*Spiriferina*) *lilangensis* Stoliczka, 1866 | Gaetani *et al.* 2018 |
| *Koeveskallina* sp. | *Koeveskallina* sp. | Gaetani *et al.* 2018 |
| Dielasmatid gen. and sp. indet. | Dielasmatid gen. and sp. indet. | Gaetani *et al.* 2018 |
| **Northwestern Turkey** | | |
| *Austriellula kavakensis* (Arthaber, 1914) | *Rhynchonella kavakensis* Arthaber, 1914 | Gaetani 2016 |
| *Holchorhynchella edhemi* (Toula, 1896) | *Rhynchonella edhemi* Toula, 1896 | Gaetani 2016 |
| ‘*Rhynchonella*’ *tscharkensis* Arthaber, 1914 | *Rhynchonella tscharkensis* Arthaber, 1914 | Gaetani 2016 |
| *Angustothyris angustaeformis* (Böckh, 1872) | *Waldheimia angustaeformis* Böckh, 1972 | Gaetani 2016 |
| *Ptychomentzelia propontica* (Toula, 1896) | *Spiriferina* (*Mentzelia*) *Mentzelii* var. *propontica*  Toula, 1896 | Gaetani 2016 |
| *Koeveskallina koeveskalyensis* (Stur, 1865) | *Spiriferina koeveskalyensis* Stur, 1865 | Gaetani 2016 |
| **Northern Siberia** | | |
| *Orbiculoidea sibirica* Moisseiev, 1947 | *Orbiculoidea sibirica* Moisseiev, 1947 | Dagys 1965, 1985 |
| *Orbiculoidea taskrestensis* Dagys, 1985 | *Orbiculoidea taskrestensis* Dagys, 1985 | Dagys 1985 |
| ‘*Lingula*’ *olenekensis* Dagys, 1965 | *Lingula* *olenekensis* Dagys, 1965 | Dagys 1965, 1985 |
| ‘*Lingula*’ *polaris* Lundgren, 1883 | *Lingula polaris* Lundgren, 1883 | Dagys 1965, 1985 |
| *Spirigerellina stoliczkai* (Bittner, 1899) | *Spirigera* (*Athyris*) *stoliczkai* Bittner, 1899 | Dagys 1985 |
| *Lepismatina lenaensis* (Dagys, 1985) | *Costispiriferina lenaensis* Dagys, 1985 | Dagys 1985 |
| ‘*Fletcherina*’ *zealandica* (Trechman, 1917) | *Dielasma zealandica* Trechman, 1917 | Dagys 1965 |
| *Tulungospirifer* sp. | *Tulungospirifer* sp. | Dagys 1993 |
| **Xizang (Himalayas)** | | |
| *Diholkorhynchia sinensis* (Koken, 1900) | *Rhynchonella sinensis* Koken, 1900 | Chen 1983 |
| *Tulungospirifer stracheyi* (Salter, 1865) | *Spiriferina stracheyi* Salter, 1865 | Jin *et al.* 1976 |
| *Yalongia angulocotata* Xu & Liu, 1983 | *Yalongia angulocotata* Xu & Liu, 1983 | Xu & Liu 1983 |
| *Koeveskallina koeveskalyensis* (Stur, 1865) | *Spiriferina koeveskalyensis* Stur, 1865 | Chen 1983 |
| *Adygella* sp. | *Adygella* sp. | Chen 1983 |
| *Nudirostralina griesbachi* (Bittner, 1899) | *Rhynchonella griesbachi* Bittner, 1899 | Jin *et al.* 1976; Chen 1983 |
| *Nudirostralina mutabilis* (Stoliczka, 1866) | *Rhynchonella mutabilis* Stoliczka, 1866 | Jin *et al.* 1976 |

*Xu (1992) has also reported *Laballa* cf. *usualis*, *Sanqiaothyris subcircularis* Yang & Xu, 1966, *Rhaetinopsis ovata*, and *Rhaetina columnaris* from the Guojiashan Formation of the western Qinling area, western China. However, they were neither described nor illustrated. Outside Dangchang, these taxa are only reported from the Upper Triassic, thus these data require further confirmation.

**References**

**Bittner, A.** 1890. Brachiopoden der alpinen Trias. *Abhandlungen der Kaiserlich-Königlichen Geologischen Reichsanstalt*, **14**, 1–325, pls 1–41.

**Chen, Y. M.** 1983. New advance in the study of Triassic brachiopods in Tulong district of Nyalam County, Tibet. *Contribution to the Geology of the Qinghai-Xizang Plateau*, **11**, 145–156.

**Dagys, A. S.** 1965. *Triasovye Brakhiopody Sibiri*. Akademiia Nauk SSSR, Sibirskoe Otdelenie, Izdatel’stvo “Nauka”, Moscow, 188 pp. [in Russian]

**Dagys, A. S.** 1974. Triasovye brakhiopody (morfologia, sistema, filogeniia, stratigraficheskoe znachenie i biogeografiia. *Akademiia Nauk SSSR, Sibirskoe Otdelenie, Institut Geologii i Geofiziki, Trudy*, **214**, 1–387. [in Russian]

**Ding, P. Z.** 1965. Permian and Triassic brachiopods from Yangkang District, Tianjun County, Qinghai Province. *Acta Palaeontologica Sinica*, **13**, 261–269. [in Chinese with English summary]

**Gaetani, M.** 2016. Brachiopods from the type-section of the Bithynian substage (Anisian, Middle Triassic, Northwestern Turkey). *Rivista Italiana di Paleontologia e Stratigrafa*, **122**, 61–76.

**Gaetani, M. & Mantovani, N.** 2015. Middle Triassic Spiriferoid Mentzeliids from Alpine and Mediterranean areas. *Rivista Italiana di Paleontologia e Stratigrafia*, **121**, p. 163–194.

**Gaetani, M., Balini, M., Nicora, A., Giorgioni, M. & Pavia, G.** 2018. The Himalayan connection of the Middle Triassic brachiopod fauna from Socotra (Yemen). *Bulletin of Geosciences*, **93**, 247–268.

**Jin, Y. G. Sun, D. L. & Rong, J. Y.** 1976. Mesozoic and Cenozoic brachiopods from the Mount Qomolangma region. Pp. 271–356 in Xizang Scientific Expedition Team of Chinese Academy of Sciences (ed.) *A Report of Scientific Expedition in the Mount Qomolangma Region (1966–1968), Palaeontology 2*. Science Press, Beijing. [in Chinese]

**Jin, Y. G., Ye, S. L., Xu, H. K. & Sun, D. L.** 1979. Brachiopoda. Pp. 60–217, pls 18–57 in Institute of Geological Science of Qinghai Province & Nanjing Institute of Geology and Palaeontology, Chinese Academy of Sciences (eds) *Paleontological Atlas of Northwestern China, Qinghai Province, Volume 1*. Geological Publishing House, Beijing. [in Chinese]

**MacFarlan, D. A. B.** 1992. Triassic and Jurassic Rhynchonellacea (Brachiopoda) from New Zealand and New Caledonia. *The Royal Society of New Zealand, Bulletin*, **31**, 1–310.

**Pálfy, J.** 1988: Middle Triassic rhynchonellids from the Balaton Highland (Transdanubian Central Range, Hungary). *Annales Historico-Naturale Musei Nationalis Hungarici*, **80**, 25–46.

**Pálfy, J.** 2003. The Pelsonian brachiopod fauna of the Balaton Highland. *Geologica Hungarica, Series Palaeontologica*, **55**, 139–158.

**Siblík, M.** 1991. Triassic brachiopods from Ahgdarband (NE-Iran). *Abhandlungen der Geologischen Bundesanstalt*, **38**, 165–174.

**Sun, D. L. & Ye, S. L.** 1982. Middle Triassic brachiopods from the Tosu Lake area, central Qinghai. *Acta Palaeontologica Sinica*, **21**, 153–173, pls 1–3. [in Chinese with English abstract]

**Vörös, A. & Pálfy, J.** 1989. The Anisian/Ladinian boundary in the Vászoly section (Balaton Highland, Hungary). *Fragmenta Mineralogica et Palaeontologica*, **14**, 17–27.

**Xu, G. R.** 1992. Descriptions of Fossils, Brachiopoda. Pp. 147–150, pls 3–4 in H. F. Yin, F. Q. Yang, Q. S. Huang, H. S. Yang & X. L. Lai (eds) *Triassic of Qinling and Its Neighboring Areas*. China University of Geosciences Press, Wuhan. [in Chinese]

**Xu, G. R. & Liu, G. C.** 1983. Analysis of the faunas. Brachiopoda. Systematic description. 1. Some problems in the research of Triassic brachiopods. 2. Brachiopoda. Pp. 34–36, 67–83, 84–123, pls 1–11 in Z. Y. Yang, G. R. Xu, S. B. Wu, Y. L. He, G. C. Liu & J. R. Yin (eds) *Triassic of the South Qilian Mountains*. Geological Publishing House, Beijing. [in Chinese with English abstract]

**Yang, Z. Y., Ding, P. Z., Yin, H. F., Zhang, S. X. & Fan, J. S.** 1962. The brachiopod fauna of Carboniferous, Permian and Triassic in the Qilianshan region. Pp. 1–134, pls 1–48 in Institute of Geology and Palaeontology, Chinese Academy of Sciences, Institute of Geology, Chinese Academy of Sciences & Beijing college of Geology (eds) *Monograph on the Geology of the Qilian Mountains v. 4, n. 4*. Science Press, Beijing. [in Chinese]
